# Supplementary material
Source: ML conference proceedings conference paper supplement (https://openreview.net/forum?id=Fp5uC6YHwe)
Supplement: supplementary_material [file attachment]

---

# 3D-IntPhys: Learning 3D Visual Intuitive Physics for Fluids, Rigid Bodies, and Granular Materials: Supplementary Material

---

Anonymous Author(s)

Affiliation

Address

email

## 1 Additional Results

2 To better understand the performance of our framework visually, we prepare test time rollouts of our  
3 framework as well as those of various baselines in the [supplementary video](#). The video is published  
4 anonymously and can be accessed in <https://sites.google.com/view/3d-intphys>

### 5 1.1 Ablation Study

6 We find that training the model with Chamfer distance in dense scenes with granular materials will  
7 often lead to predictions with unevenly distributed points where some points stick too close to each  
8 other. To alleviate the issue, we introduce the spacing loss to penalize the distance between these  
9 points. We set the threshold of penalty  $d_{min}$  to be 0.08 and the loss weight  $\sigma$  to be 10. We find that  
10 spacing loss can help improve the performance of the dynamics learner especially under extrapolate  
11 settings, as shown in Figure 1. We provide qualitative results in the [supplementary video](#).

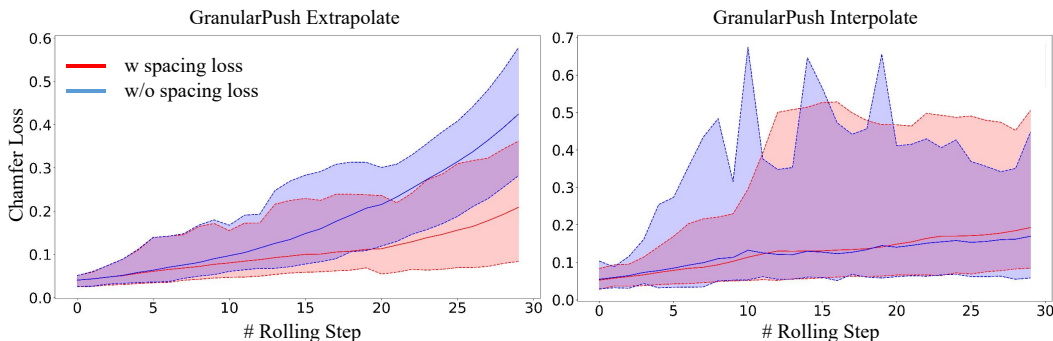

Figure 1: **Ablation Study on the Spacing Loss.** Training dynamics models in the GranularPush scenario with spacing loss results in better rolling prediction. The performance gap is even more substantial in the extrapolate setting.

## 12 2 Implementation Details

### 13 2.1 Dataset Generation

14 Our datasets are generated by the NVIDIA Flex simulator. Each of the three scenarios (Pour, Shake  
15 and Push) has 500 videos of trajectories taken from 6 views, with each trajectory consisting of 300

|                | X-Range          | Y-Range        | Z-Range         |
|----------------|------------------|----------------|-----------------|
| FluidPour      | [-29.11, -12.66] | [42.00, 60.00] | [-7.78, 7.78]   |
| FluidCubeShake | [-3.25, 42.25]   | [19.25, 19.25] | [-24.50, 24.00] |

Table 1: **Robot Action Space(centimeters):** we show the range the robot arms can move in the FluidPour and FluidCubeShake environments.

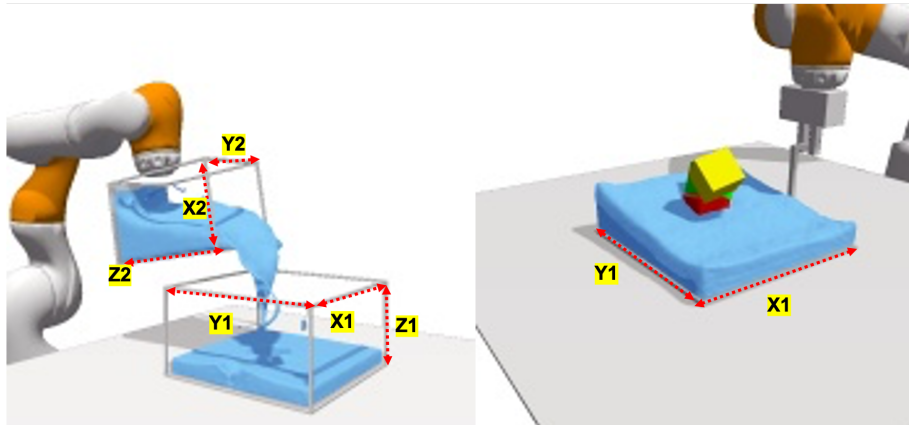

Figure 2: **Illustration of the Environment Settings.** In the FluidPour scenario, a robot arm holds a container and tries to pour some fluid into another container. In the FluidShake scenario, a robot moves a container with some fluid and cubes. We show the parameters for the container shape referred in Table 2.

16 frames. We manually select the 6 views with reasonable coverage of the tabletop space to minimize  
 17 the occlusion. The 500 trials are generated from five different sets of environmental parameters,  
 18 detailed in Table 2. We take one set of parameters that are outside the training distribution as the  
 19 **extrapolate** dataset for evaluating model generalization. For the rest of the four settings, we randomly  
 20 split them into train and test sets with a ratio of 0.8.

21 Next, we provide more details for each scenario:

- 22 • In the FluidPour environment, we randomly initialize the position of the upper container  
 23 and then generate random back-and-forth actions by tilting the container. The action space  
 24 is then the position and tilting angle of the upper container.
- 25 • In FluidCubeShake, we also randomly initialize the position of the container and the cubes  
 26 inside the container. We then generate random but smooth action sequences moving the  
 27 container in the 2D plane. The action space is then the x-y location of the container.
- 28 • In GranularPush, we randomly initialize the position of the granular pile. Then, for each  
 29 push, we randomly generate the starting and ending positions of the pusher and move the  
 30 pusher along the straight line with an angle perpendicular to the pushing direction. The  
 31 action space is a four-number tuple stating the starting and ending position on the 2D plane.

32 The following table shows the moving range of the robot arms in the FluidPour and FluidCubeShake  
 33 environments after normalizing the robot into a size that is the same as in the real world (unit:  
 34 centimeters). For GranularPush, the pusher is moving over the entire table; we ignore the specific  
 35 number in this environment as we do not have robot arms as a reference.

36 **Additional dataset samples.** We show samples from the FluidPour, FluidCubeShake and Granular-  
 37 Push dataset in Figure 3, 4 and 5, respectively. Note that all trajectories for the extrapolate settings  
 38 are used only for testing and will not show up during the training process. We include more samples  
 39 from the dataset in the video format in the [supplementary video](#).

| SceneName      | Params         | Env1 | Env2 | Env3 | Env4 | Extrapolate |
|----------------|----------------|------|------|------|------|-------------|
| FluidPour      | X2             | 0.53 | 0.53 | 0.81 | 0.81 | 0.81        |
|                | Y2             | 0.53 | 0.81 | 0.53 | 0.81 | 0.81        |
|                | Z2             | 1.24 | 1.24 | 1.24 | 1.24 | 1.24        |
|                | X1             | 1.35 | 1.35 | 1.35 | 1.35 | 1.35        |
|                | Y1             | 1.35 | 1.35 | 1.35 | 1.35 | 1.35        |
|                | Z1             | 0.74 | 0.74 | 0.74 | 0.74 | 0.74        |
|                | AmountofWater  | 5125 | 5125 | 6125 | 5375 | 7625        |
| FluidCubeShake | X1             | 0.88 | 0.88 | 1.32 | 1.32 | 1.32        |
|                | Y1             | 0.88 | 1.32 | 0.88 | 1.32 | 1.32        |
|                | CubeNumber     | 1    | 1    | 2    | 2    | 3           |
|                | Water          | 2173 | 3322 | 3322 | 4858 | 4983        |
| GranularPush   | GranularNumber | 2197 | 4032 | 5832 | 9261 | 12167       |

Table 2: **Scene Parameters for Generating the Interpolate and Extrapolate Datasets.** We generate the datasets by varying the shape of container, amount of water, number of cubes, and quantity of the granular material.  $Z_i, X_i, Y_i$  are the height, width, and depth for a container  $i$ . Please refer to Figure 2 for more details.

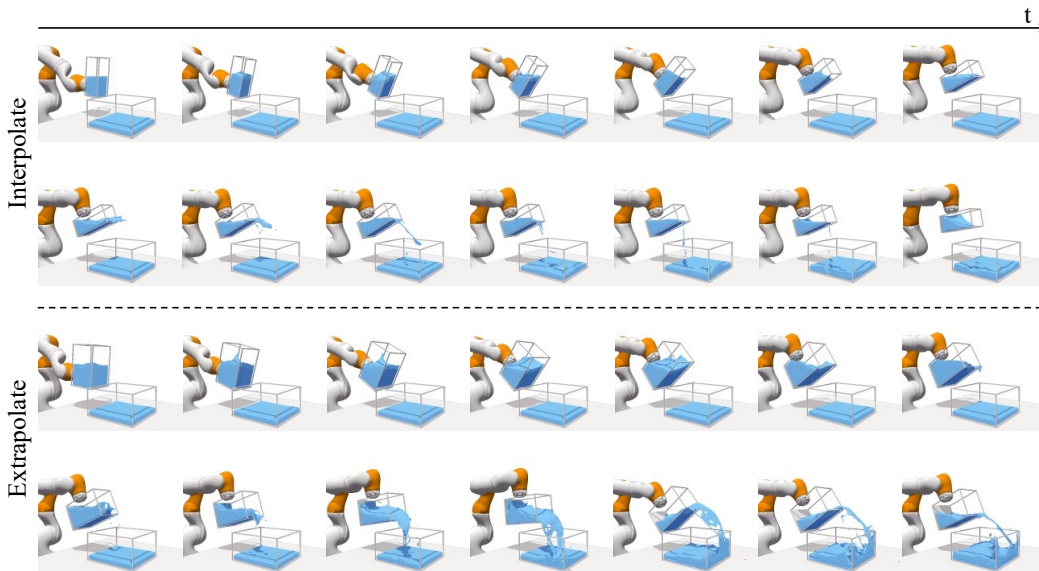

Figure 3: **Samples from FluidPour Dataset.** We show sequences of frames over time with an interval of 20 frames. The sequences above the dashed line are for **interpolate** data, and the bottom images illustrate the **extrapolate** data.

## 40 2.2 Model Architecture

41 **Image-conditional NeRF.** We follow the architectural design by [68]. For the feature encoder, we  
 42 employ a ResNet-34 backbone to extract features. We use the output layers prior to the first four  
 43 pooling layers, upsampling them using bilinear interpolation to the same size, and then concatenating  
 44 these four feature maps. We initialize the weight of the feature extractor of the scene using ImageNet  
 45 pre-trained weight. For the NeRF function  $f$ , We use fully-connected ResNet architecture with 5  
 46 ResNet blocks with a width of 512.

47 **Dynamics predictor.** For the edge and vertice encoders,  $Q_e$  and  $Q_v$ , we use 3-layer fully-connected  
 48 networks activated by the ReLU function with 150 hidden units. For the propagators,  $P_e$  and  $P_v$ , we  
 49 use a 1-layer fully-connected network followed by ReLU activation. The output dimension of the  
 50 linear layer is 150.

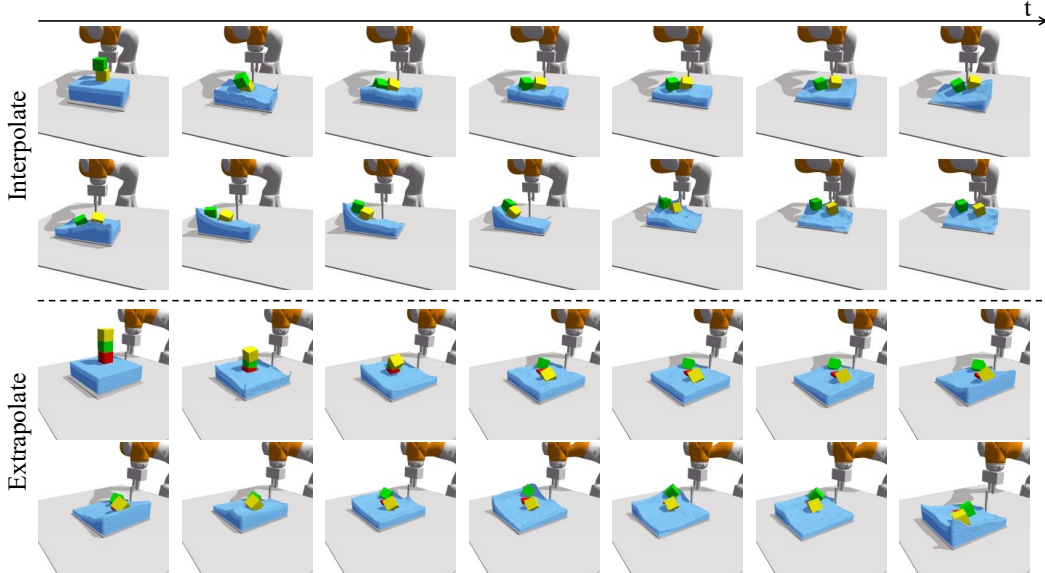

Figure 4: **Samples from FluidCubeShake Dataset.** We show sequences of frames over time with an interval of 20 frames. The sequences above the dashed line are for **interpolate** data, and the bottom images illustrate the **extrapolate** data.

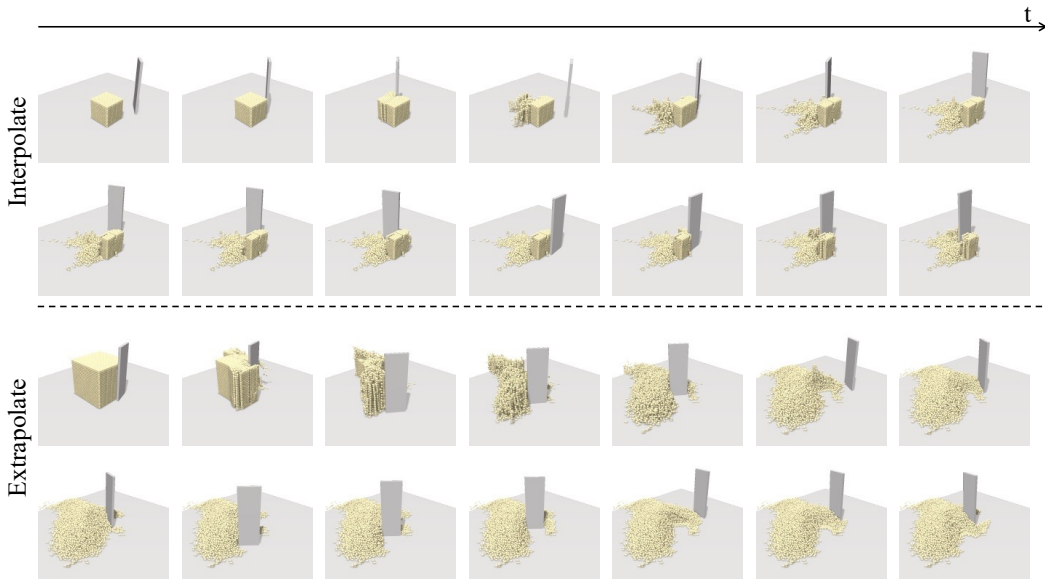

Figure 5: **Samples from GranularPush Dataset.** We show sequences of frames over time with an interval of 20 frames. The sequences above the dashed line are for **interpolate** data, and the bottom images illustrate the **extrapolate** data.

51 **Sampling 3D points from the trained visual perception module.** We sample points on a  $40 \times 40 \times 40$   
 52 grid from an area of  $55\text{cm} \times 55\text{cm} \times 55\text{cm}$  and  $63\text{cm} \times 63\text{cm} \times 63\text{cm}$  at the center of the table  
 53 for FluidPour and FluidCubeShake respectively, and on a  $70 \times 70 \times 70$  grid from an area of  
 54  $6\text{cm} \times 6\text{cm} \times 6\text{cm}$  for GranularPush. We evaluate and include points with a density (measured by  
 55 the occupancy in the predicted neural radiance fields) larger than 0.99. To reduce the total number of  
 56 points, we subsample the inferred points with FPS with a ratio of 5% for FluidPour and 10% for  
 57 FluidCubeShake and GranularPush.

58 **Graph building.** We set the neighbour distance threshold  $\delta$  to be 0.2, 0.15, 0.15 for FluidPour,  
 59 FluidCubeShake and GranularPush respectively. We select the threshold so that each point will  
 60 have on average 20 30 neighbors. Since, in FluidPour, we sample the points with lower density  
 61 2000points/ $m^2$ , we use a larger threshold for this scenario. For FluidShape and GranularPush, since  
 62 the density is around 3000 points/ $m^2$ , we cut down the number by 25%.

63 We found that if the threshold is too small, the performance will degrade significantly since each  
 64 particle will only receive messages from a few neighbors (and miss out on the larger context). On the  
 65 other hand, setting the threshold too large will cause the training time to increase since the graph will  
 66 have more edges. We found that setting the threshold around the right scale generally leads to more  
 67 effective training of a reasonable dynamics network.

## 68 2.3 Training Details

69 The models are implemented in PyTorch. We train the perception module using Adam optimizer  
 70 with a learning rate of  $1e-4$ , and we reduce the learning rate by 80% when the performance on the  
 71 validation set has stopped improving for 3 epochs. To compute the rendering loss when training the  
 72 perception module, we sample 64 points through each ray in the scene and set the ray-batch size of  
 73 the NeRF query function  $f$  to be  $1024 \times 32$ . Training the perception module on a single scenario  
 74 takes around 5 hours on one RTX-3090.

75 We train the dynamics simulator using Adam optimizer with a learning rate of  $1e-4$ , and we reduce  
 76 the learning rate by 80% when the performance on the validation set has stopped improving for 3  
 77 epochs. The batch size is set to 4. We train the model for 20, 30, and 40 epochs for FluidPour,  
 78 FluidCubeShake, and GranularPush, respectively. It takes around 10 ~ 15 hours to train the dynamics  
 79 model in one environment on one single RTX-3090.

## 80 2.4 Graph-Based Dynamics Model without Particle-level Correspondence

81 The velocity of an object provides critical information on how the object will move in the future, yet,  
 82 we do not have access to such information when tracking the object is impossible. As described in  
 83 Section 3.2, the attributes  $a_i^v$  of a vertex  $v_i$  in the built graph consists of (1) velocity of this point in  
 84 the past frames and (2) attributes of the point (rigid, fluid, granular). To get the velocity of a vertex  $v$ ,  
 85 we should have the history position of this vertex. However, since the point clouds are inferred from  
 86 each frame independently, we do not know how each point moves over time since we do not have  
 87 point correspondence between frames.

88 To address the problem, we leverage the fact that some objects in the scene are easier to track, and  
 89 we try to use the motion of these trackable objects to infer motion for the untrackable units. We  
 90 assume that we know the dense-labeled states of some known fully-actuated shapes like desks and  
 91 cups connected to the robot arms. Here we will list one specific scenario where a cup of water is  
 92 poured into another cup. In this case, we have two different types of points: points for fluid and points  
 93 for cups, we name the states of them in time step  $t$  as  $V_P^t = \{v_{P,i}^t\}$  and  $V_S^t = \{v_{S,i}^t\}$  respectively.  
 94 For the particle encoder  $Q_v$ , if the particle belongs to the cups, then the input of particle encoder  
 95 contains  $n_s$  history states before  $t_0 : \{V_S^{(t_0-n_s):t_0}\}$ . If the particle belongs to the water, then we have  
 96 no history states, so the input of  $Q_v$  is all-zero.

97 By adding the relative position between receiver and sender points, we can pass the momentum of  $V_P$   
 98 to  $V_S$ . Compared with human intuition, we can get an intuitive prediction of the movement of water  
 99 by simply knowing the past movement of the cup without knowing the past movement of water.

100 Following [47], we use the velocity of points and their relative position as inputs to the dynamics  
 101 module instead of using the absolute positions of the points. This ensures the model is translation-  
 102 invariant so the learned dynamics model can be shared across different spatial locations.

## 103 2.5 Inference Speed of Our Model

104 The prediction speed of the dynamics module depends on the number of input particles, and it takes  
 105 around 0.1s for graphs with around 300 nodes in FluidShake and FluidPour, and around 0.2s for  
 106 scenes with 700+ nodes in GranularPush.

107 For our visual module, the main time consumption comes from NeRF sampling, it takes 0.2s to  
108 sample from a grid space introduced in the experiment section of our paper, this was run in blocks,  
109 with block-size=1000, made up 4G of a V100 GPU. And it can be even faster with larger blocks. The  
110 sub-sampling process (FPS, segmentation) is fast since they are all written in parallel versions, which  
111 takes less than 5ms.

### 112 **3 Potential Society Impact**

113 Our work shows the possibility of learning dynamics models from raw sensory inputs, opening up  
114 opportunities to automate the design of differentiable physics engines through data-driven learning  
115 algorithms. The resulting system can potentially benefit many downstream tasks, including general  
116 scene understanding, robotics manipulation, the construction of 3D generative models, and inverse  
117 tasks like planning/control and inverse design. Furthermore, predictions from our model are highly  
118 interpretable, which makes it straightforward to explain model behaviors and re-purpose the outputs  
119 for other downstream applications.

120 Though data-driven approaches are potentially more scalable with enough data, concerns still exist  
121 that it might be hard to ensure the robustness of the model under sensor noise and adversarial  
122 attacks. It also becomes less clear how to fully mitigate data biases. Therefore, bringing in advanced  
123 techniques from ML robustness will be one critical future avenue to pursue.

### 124 **4 Some Discussions**

125 **Q:** *What is the novelty of the proposed framework?*

126 The proposed work aims to tackle the challenging problems of learning visual dynamics from raw  
127 images, which neither pixel-NeRF nor graph-based dynamics models alone can solve.

128 Simply combining the two methods, unfortunately, does not provide a valid solution to the problem  
129 since existing point-based dynamics models need to learn from strong supervision provided by 3D  
130 ground truth point trajectories, which are hard to obtain in most real setups. For example, in our water  
131 experiments, it is impossible for any existing tracking method to successfully track each water particle.  
132 To tackle the problem, we propose several new techniques to facilitate dynamics learning without  
133 dense correspondence, including momentum passing from containers to fluids and new training loss  
134 (e.g., Chamfer distance loss and spacing loss). They allow more robust learning of dynamics models  
135 on raw point clouds sampled from the learned occupancy field (instead of the original simulator).

136 **Q:** *Is the color segmentation of the fluid objects a reasonable assumption?*

137 It should be noted that the color-based segmentation will not degrade the challenging problem of  
138 learning 3D Intuitive Physics, since the task focuses more on learning complex visual dynamics from  
139 images.

140 We want to emphasize that the work focuses more on learning complex visual dynamics from images,  
141 as opposed to solving object segmentation in general. Learning fluids dynamics from videos is a  
142 challenging task, and there are only a few existing works. NeRF-dy is the closest to us, yet the model’s  
143 generalization ability is limited. We have shown in the proposed work that we can significantly  
144 improve the generalization ability by operating with a hybrid of implicit and explicit, as opposed to  
145 pure implicit, 3D representations. We agree object segmentation is a critical visual understanding  
146 problem, and solving it is an important next step to getting a more general visual dynamics learning  
147 framework.

148 With recent advancements such as SAM [29] and SEER [71], which focus on segmentation in real-  
149 world scenarios, the possibility of video segmentation without the need for annotations has emerged  
150 (as is shown in Figure 6). This development paves the way for leveraging existing large-scale models  
151 to enhance the segmentation pipeline, offering great promise for future applications.

152 **Q:** *Since the fluid has zero velocities, how to predict the intuitive dynamics?*

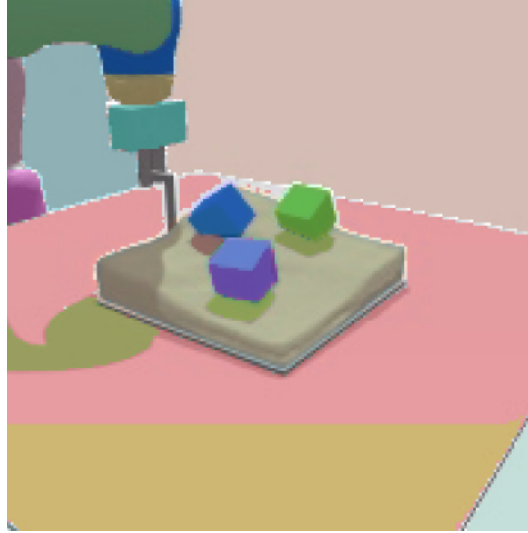

Figure 6: **SAM Working on FluidCube Shake:** Recent large segmentation models can well generate masks for different objects in the scene.

153 The intuition is that we can infer the water movement from the container’s movement. We also  
 154 assume that the initial velocity of water is **nearly zero**, which is also used in [50], so the momentum  
 155 can be gradually passed from the container to the water.

156 We propose this assumption so that the intuitive physics model can be learned from (1) particles  
 157 sampled from the neural radiance field, which is not stable (2) point clouds without one-to-one  
 158 correspondence. The results show that we can learn reasonable dynamics (water poured out from a  
 159 cup, water falling in the container, cubes moving in water, and granular materials pushed away by a  
 160 pusher). It also shows the potential of distribution-based loss in learning visual dynamics.

## 161 References

- 162 [1] P. Agrawal, A. V. Nair, P. Abbeel, J. Malik, and S. Levine. Learning to poke by poking:  
 163 Experiential learning of intuitive physics. *Advances in neural information processing systems*,  
 164 29, 2016.
- 165 [2] A. Ajay, M. Bauzá, J. Wu, N. Fazeli, J. B. Tenenbaum, A. Rodriguez, and L. P. Kaelbling.  
 166 Combining physical simulators and object-based networks for control. *CoRR*, abs/1904.06580,  
 167 2019.
- 168 [3] K. R. Allen, T. Lopez-Guevara, K. L. Stachenfeld, A. Sanchez-Gonzalez, P. W. Battaglia,  
 169 J. B. Hamrick, and T. Pfaff. Physical design using differentiable learned simulators. *CoRR*,  
 170 abs/2202.00728, 2022.
- 171 [4] M. Babaeizadeh, M. T. Saffar, S. Nair, S. Levine, C. Finn, and D. Erhan. Fitvid: Overfitting in  
 172 pixel-level video prediction. *CoRR*, abs/2106.13195, 2021.
- 173 [5] R. Baillargeon, E. S. Spelke, and S. Wasserman. Object permanence in five-month-old infants.  
 174 *Cognition*, 20:191–208, 1985.
- 175 [6] C. Bates, I. Yildirim, J. B. Tenenbaum, and P. W. Battaglia. Modeling human intuitions about  
 176 liquid flow with particle-based simulation. *CoRR*, abs/1809.01524, 2018.
- 177 [7] P. W. Battaglia, J. B. Hamrick, V. Bapst, A. Sanchez-Gonzalez, V. F. Zambaldi, M. Malinowski,  
 178 A. Tacchetti, D. Raposo, A. Santoro, R. Faulkner, Ç. Gülçehre, H. F. Song, A. J. Ballard,  
 179 J. Gilmer, G. E. Dahl, A. Vaswani, K. R. Allen, C. Nash, V. Langston, C. Dyer, N. Heess,  
 180 D. Wierstra, P. Kohli, M. M. Botvinick, O. Vinyals, Y. Li, and R. Pascanu. Relational inductive  
 181 biases, deep learning, and graph networks. *CoRR*, abs/1806.01261, 2018.

- 182 [8] P. W. Battaglia, J. B. Hamrick, and J. B. Tenenbaum. Simulation as an engine of physical scene  
183 understanding. *Proceedings of the National Academy of Sciences*, 110:18327 – 18332, 2013.
- 184 [9] D. M. Bear, E. Wang, D. Mrowca, F. J. Binder, H.-Y. F. Tung, R. Pramod, C. Holdaway, S. Tao,  
185 K. Smith, L. Fei-Fei, et al. Physion: Evaluating physical prediction from vision in humans and  
186 machines. *arXiv preprint arXiv:2106.08261*, 2021.
- 187 [10] Y. Burda, H. Edwards, D. Pathak, A. Storkey, T. Darrell, and A. A. Efros. Large-scale study of  
188 curiosity-driven learning. In *ICLR*, 2019.
- 189 [11] S. Carey and F. Xu. Infants’ knowledge of objects: beyond object files and object tracking.  
190 *Cognition*, 80(1):179–213, 2001. Objects and Attention.
- 191 [12] M. B. Chang, T. D. Ullman, A. Torralba, and J. B. Tenenbaum. A compositional object-based  
192 approach to learning physical dynamics. *CoRR*, abs/1612.00341, 2016.
- 193 [13] F. de Avila Belbute-Peres, T. D. Economou, and J. Z. Kolter. Combining differentiable PDE  
194 solvers and graph neural networks for fluid flow prediction. *CoRR*, abs/2007.04439, 2020.
- 195 [14] D. Ding, F. Hill, A. Santoro, and M. M. Botvinick. Object-based attention for spatio-temporal  
196 reasoning: Outperforming neuro-symbolic models with flexible distributed architectures. *CoRR*,  
197 abs/2012.08508, 2020.
- 198 [15] D. Driess, J.-S. Ha, M. Toussaint, and R. Tedrake. Learning models as functionals of signed-  
199 distance fields for manipulation planning. In *Conference on Robot Learning*, pages 245–255.  
200 PMLR, 2022.
- 201 [16] D. Driess, Z. Huang, Y. Li, R. Tedrake, and M. Toussaint. Learning multi-object dynamics with  
202 compositional neural radiance fields. *arXiv preprint arXiv:2202.11855*, 2022.
- 203 [17] Y. Eldar, M. Lindenbaum, M. Porat, and Y. Zeevi. The farthest point strategy for progressive  
204 image sampling. *IEEE Transactions on Image Processing*, 6(9):1305–1315, 1997.
- 205 [18] S. A. Eslami, D. Jimenez Rezende, F. Besse, F. Viola, A. S. Morcos, M. Garnelo, A. Ruderman,  
206 A. A. Rusu, I. Danihelka, K. Gregor, et al. Neural scene representation and rendering. *Science*,  
207 360(6394):1204–1210, 2018.
- 208 [19] C. Finn, I. J. Goodfellow, and S. Levine. Unsupervised learning for physical interaction through  
209 video prediction. *CoRR*, abs/1605.07157, 2016.
- 210 [20] C. Finn and S. Levine. Deep visual foresight for planning robot motion. In *2017 IEEE*  
211 *International Conference on Robotics and Automation (ICRA)*, pages 2786–2793. IEEE, 2017.
- 212 [21] K. Fragkiadaki, P. Agrawal, S. Levine, and J. Malik. Learning visual predictive models of  
213 physics for playing billiards. In Y. Bengio and Y. LeCun, editors, *4th International Conference*  
214 *on Learning Representations, ICLR 2016, San Juan, Puerto Rico, May 2-4, 2016, Conference*  
215 *Track Proceedings*, 2016.
- 216 [22] R. Girdhar, L. Gustafson, A. Adcock, and L. van der Maaten. Forward prediction for physical  
217 reasoning. *CoRR*, abs/2006.10734, 2020.
- 218 [23] D. Hafner, T. Lillicrap, J. Ba, and M. Norouzi. Dream to control: Learning behaviors by latent  
219 imagination. *arXiv preprint arXiv:1912.01603*, 2019.
- 220 [24] D. Hafner, T. Lillicrap, I. Fischer, R. Villegas, D. Ha, H. Lee, and J. Davidson. Learning latent  
221 dynamics for planning from pixels. In *International conference on machine learning*, pages  
222 2555–2565. PMLR, 2019.
- 223 [25] D. Hafner, T. P. Lillicrap, J. Ba, and M. Norouzi. Dream to control: Learning behaviors by  
224 latent imagination. *CoRR*, abs/1912.01603, 2019.
- 225 [26] M. Janner, J. Fu, M. Zhang, and S. Levine. When to trust your model: Model-based policy  
226 optimization. *CoRR*, abs/1906.08253, 2019.



- 227 [27] M. Janner, S. Levine, W. T. Freeman, J. B. Tenenbaum, C. Finn, and J. Wu. Reasoning about  
228 physical interactions with object-oriented prediction and planning. In *International Conference*  
229 *on Learning Representations*, 2019.
- 230 [28] T. Kipf, E. van der Pol, and M. Welling. Contrastive learning of structured world models. *arXiv*  
231 *preprint arXiv:1911.12247*, 2019.
- 232 [29] A. Kirillov, E. Mintun, N. Ravi, H. Mao, C. Rolland, L. Gustafson, T. Xiao, S. Whitehead, A. C.  
233 Berg, W.-Y. Lo, et al. Segment anything. *arXiv preprint arXiv:2304.02643*, 2023.
- 234 [30] A. X. Lee, R. Zhang, F. Ebert, P. Abbeel, C. Finn, and S. Levine. Stochastic adversarial video  
235 prediction. *CoRR*, abs/1804.01523, 2018.
- 236 [31] A. Lerer, S. Gross, and R. Fergus. Learning physical intuition of block towers by example.  
237 *CoRR*, abs/1603.01312, 2016.
- 238 [32] T. Li, M. Slavcheva, M. Zollhoefer, S. Green, C. Lassner, C. Kim, T. Schmidt, S. Lovegrove,  
239 M. Goesele, and Z. Lv. Neural 3d video synthesis. *arXiv preprint arXiv:2103.02597*, 2021.
- 240 [33] W. Li, S. Azimi, A. Leonardis, and M. Fritz. To fall or not to fall: A visual approach to physical  
241 stability prediction. *CoRR*, abs/1604.00066, 2016.
- 242 [34] Y. Li, S. Li, V. Sitzmann, P. Agrawal, and A. Torralba. 3d neural scene representations for  
243 visuomotor control. *arXiv preprint arXiv:2107.04004*, 2021.
- 244 [35] Y. Li, T. Lin, K. Yi, D. Bear, D. L. Yamins, J. Wu, J. B. Tenenbaum, and A. Torralba. Visual  
245 grounding of learned physical models. In *International Conference on Machine Learning*, 2020.
- 246 [36] Y. Li, J. Wu, R. Tedrake, J. B. Tenenbaum, and A. Torralba. Learning particle dynamics for  
247 manipulating rigid bodies, deformable objects, and fluids. In *ICLR*, 2019.
- 248 [37] Y. Li, J. Wu, J.-Y. Zhu, J. B. Tenenbaum, A. Torralba, and R. Tedrake. Propagation networks for  
249 model-based control under partial observation. In *2019 International Conference on Robotics*  
250 *and Automation (ICRA)*, pages 1205–1211. IEEE, 2019.
- 251 [38] X. Lin, Y. Wang, Z. Huang, and D. Held. Learning visible connectivity dynamics for cloth  
252 smoothing. In *Conference on Robot Learning*, 2021.
- 253 [39] M. Macklin, M. Müller, N. Chentanez, and T.-Y. Kim. Unified particle physics for real-time  
254 applications. *ACM Transactions on Graphics (TOG)*, 33(4):1–12, 2014.
- 255 [40] L. Manuelli, Y. Li, P. Florence, and R. Tedrake. Keypoints into the future: Self-supervised  
256 correspondence in model-based reinforcement learning. *arXiv preprint arXiv:2009.05085*,  
257 2020.
- 258 [41] B. Mildenhall, P. P. Srinivasan, M. Tancik, J. T. Barron, R. Ramamoorthi, and R. Ng. Nerf:  
259 Representing scenes as neural radiance fields for view synthesis. In *European conference on*  
260 *computer vision*, pages 405–421. Springer, 2020.
- 261 [42] D. Mrowca, C. Zhuang, E. Wang, N. Haber, L. Fei-Fei, J. B. Tenenbaum, and D. L. K. Yamins.  
262 Flexible neural representation for physics prediction. *CoRR*, abs/1806.08047, 2018.
- 263 [43] T. Pfaff, M. Fortunato, A. Sanchez-Gonzalez, and P. W. Battaglia. Learning mesh-based  
264 simulation with graph networks. In *International Conference on Learning Representations*,  
265 2021.
- 266 [44] H. Qi, X. Wang, D. Pathak, Y. Ma, and J. Malik. Learning long-term visual dynamics with  
267 region proposal interaction networks. In *ICLR*, 2021.
- 268 [45] R. Riochet, J. Sivic, I. Laptev, and E. Dupoux. Occlusion resistant learning of intuitive physics  
269 from videos. *CoRR*, abs/2005.00069, 2020.
- 270 [46] A. N. Sanborn, V. K. Mansinghka, and T. L. Griffiths. Reconciling intuitive physics and  
271 newtonian mechanics for colliding objects. *Psychological review*, 120 2:411–37, 2013.

- 272 [47] A. Sanchez-Gonzalez, J. Godwin, T. Pfaff, R. Ying, J. Leskovec, and P. Battaglia. Learning  
273 to simulate complex physics with graph networks. In *International Conference on Machine*  
274 *Learning*, pages 8459–8468. PMLR, 2020.
- 275 [48] A. Sanchez-Gonzalez, N. Heess, J. T. Springenberg, J. Merel, M. A. Riedmiller, R. Hadsell, and  
276 P. W. Battaglia. Graph networks as learnable physics engines for inference and control. *CoRR*,  
277 abs/1806.01242, 2018.
- 278 [49] J. Schrittwieser, I. Antonoglou, T. Hubert, K. Simonyan, L. Sifre, S. Schmitt, A. Guez, E. Lock-  
279 hart, D. Hassabis, T. Graepel, et al. Mastering atari, go, chess and shogi by planning with a  
280 learned model. *Nature*, 588(7839):604–609, 2020.
- 281 [50] H. Shi, H. Xu, Z. Huang, Y. Li, and J. Wu. Robocraft: Learning to see, simulate, and shape  
282 elasto-plastic objects with graph networks. *arXiv preprint arXiv:2205.02909*, 2022.
- 283 [51] K. Smith, L. Mei, S. Yao, J. Wu, E. Spelke, J. Tenenbaum, and T. Ullman. Modeling expectation  
284 violation in intuitive physics with coarse probabilistic object representations. In H. Wallach,  
285 H. Larochelle, A. Beygelzimer, F. d'Alché-Buc, E. Fox, and R. Garnett, editors, *Advances in*  
286 *Neural Information Processing Systems*, volume 32. Curran Associates, Inc., 2019.
- 287 [52] E. S. Spelke. Principles of object perception. *Cognitive Science*, 14(1):29–56, 1990.
- 288 [53] H. Suh and R. Tedrake. The surprising effectiveness of linear models for visual foresight in  
289 object pile manipulation. In *International Workshop on the Algorithmic Foundations of Robotics*,  
290 pages 347–363. Springer, 2020.
- 291 [54] A. Tacchetti, H. F. Song, P. A. M. Mediano, V. F. Zambaldi, N. C. Rabinowitz, T. Graepel, M. M.  
292 Botvinick, and P. W. Battaglia. Relational forward models for multi-agent learning. *CoRR*,  
293 abs/1809.11044, 2018.
- 294 [55] H.-Y. F. Tung, Z. Xian, M. Prabhudesai, S. Lal, and K. Fragkiadaki. 3d-oes: Viewpoint-invariant  
295 object-factorized environment simulators. *arXiv preprint arXiv:2011.06464*, 2020.
- 296 [56] T. Ullman, E. Kosoy, I. Yildirim, A. A. Soltani, M. H. Siegel, J. Tenenbaum, and E. S. Spelke.  
297 Draping an elephant: Uncovering children’s reasoning about cloth-covered objects. In *Pro-*  
298 *ceedings of the 41st Annual Conference of the Cognitive Science Society*, pages 3008–3014,  
299 2019.
- 300 [57] B. Ummenhofer, L. Prantl, N. Thuerey, and V. Koltun. Lagrangian fluid simulation with  
301 continuous convolutions. In *International Conference on Learning Representations*, 2019.
- 302 [58] R. Veerapaneni, J. D. Co-Reyes, M. Chang, M. Janner, C. Finn, J. Wu, J. B. Tenenbaum,  
303 and S. Levine. Entity abstraction in visual model-based reinforcement learning. *CoRR*,  
304 abs/1910.12827, 2019.
- 305 [59] C. Vondrick, H. Pirsiavash, and A. Torralba. Anticipating the future by watching unlabeled  
306 video. *CoRR*, abs/1504.08023, 2015.
- 307 [60] M. Watter, J. Springenberg, J. Boedecker, and M. Riedmiller. Embed to control: A locally linear  
308 latent dynamics model for control from raw images. *Advances in neural information processing*  
309 *systems*, 28, 2015.
- 310 [61] N. Watters, D. Zoran, T. Weber, P. Battaglia, R. Pascanu, and A. Tacchetti. Visual interaction  
311 networks: Learning a physics simulator from video. *Advances in neural information processing*  
312 *systems*, 30, 2017.
- 313 [62] B. Wu, S. Nair, R. Martín-Martín, L. Fei-Fei, and C. Finn. Greedy hierarchical variational  
314 autoencoders for large-scale video prediction. *CoRR*, abs/2103.04174, 2021.
- 315 [63] Z. Xu, Z. He, J. Wu, and S. Song. Learning 3d dynamic scene representations for robot  
316 manipulation. In *Conference on Robotic Learning (CoRL)*, 2020.
- 317 [64] Z. Xu, J. Wu, A. Zeng, J. B. Tenenbaum, and S. Song. Densephysnet: Learning dense physical  
318 object representations via multi-step dynamic interactions. In *Robotics: Science and Systems*  
319 *(RSS)*, 2019.

- 320 [65] T. Xue, J. Wu, K. L. Bouman, and W. T. Freeman. Visual dynamics: Probabilistic future frame  
321 synthesis via cross convolutional networks. In *Advances In Neural Information Processing*  
322 *Systems*, 2016.
- 323 [66] Y. Ye, D. Gandhi, A. Gupta, and S. Tulsiani. Object-centric forward modeling for model  
324 predictive control. In *CoRL*, 2019.
- 325 [67] Y. Ye, M. Singh, A. Gupta, and S. Tulsiani. Compositional video prediction. In *International*  
326 *Conference on Computer Vision (ICCV)*, 2019.
- 327 [68] A. Yu, V. Ye, M. Tancik, and A. Kanazawa. pixelnerf: Neural radiance fields from one or  
328 few images. In *Proceedings of the IEEE/CVF Conference on Computer Vision and Pattern*  
329 *Recognition*, pages 4578–4587, 2021.
- 330 [69] M. Zhang, S. Vikram, L. Smith, P. Abbeel, M. J. Johnson, and S. Levine. SOLAR: deep struc-  
331 tured latent representations for model-based reinforcement learning. *CoRR*, abs/1808.09105,  
332 2018.
- 333 [70] R. Zhang, J. Wu, C. Zhang, W. T. Freeman, and J. B. Tenenbaum. A comparative evaluation of  
334 approximate probabilistic simulation and deep neural networks as accounts of human physical  
335 scene understanding. *CoRR*, abs/1605.01138, 2016.
- 336 [71] X. Zou, J. Yang, H. Zhang, F. Li, L. Li, J. Gao, and Y. J. Lee. Segment everything everywhere  
337 all at once. *arXiv preprint arXiv:2304.06718*, 2023.
